# Supplementary material for: Prevalence, Time Trends, and Utilization Patterns of Psychotropic Polypharmacy Among Pediatric Medicaid Beneficiaries, 1999–2010
Source: Atypon-hosted journal article supplement (doi:10.1176/appi.ps.201700260), 2018-06-08
Supplement: appi.ps.201700260.ds001.pdf [file appi.ps.201700260.ds001.pdf]

## APPENDIX

Table 1. List of psychotropic medications considered for polypharmacy analysis

| Active ingredient | Psychotropic drug class | Active ingredient   | Psychotropic drug class             |
|-------------------|-------------------------|---------------------|-------------------------------------|
| clonidine         | Alpha Agonists          | 5-hydroxytryptophan | Antidepressants                     |
| guanfacine        | Alpha Agonists          | amitriptyline       | Antidepressants                     |
| acetazolamide     | Anticonvulsants         | amoxapine           | Antidepressants                     |
| carbamazepine     | Anticonvulsants         | bupropion           | Antidepressants                     |
| clobazam          | Anticonvulsants         | citalopram          | Antidepressants                     |
| clonazepam        | Anticonvulsants         | escitalopram        | Antidepressants                     |
| diazepam          | Anticonvulsants         | clomipramine        | Antidepressants                     |
| divalproex sodium | Anticonvulsants         | desipramine         | Antidepressants                     |
| valproic acid     | Anticonvulsants         | desvenlafaxine      | Antidepressants                     |
| ethosuximide      | Anticonvulsants         | venlafaxine         | Antidepressants                     |
| ethotoin          | Anticonvulsants         | doxepin             | Antidepressants                     |
| ezogabine         | Anticonvulsants         | duloxetine          | Antidepressants                     |
| felbamate         | Anticonvulsants         | fluoxetine          | Antidepressants                     |
| fosphenytoin      | Anticonvulsants         | fluvoxamine         | Antidepressants                     |
| gabapentin        | Anticonvulsants         | imipramine          | Antidepressants                     |
| lacosamide        | Anticonvulsants         | isocarboxazid       | Antidepressants                     |
| lamotrigine       | Anticonvulsants         | maprotiline         | Antidepressants                     |
| levetiracetam     | Anticonvulsants         | milnacipran         | Antidepressants                     |
| lorazepam         | Anticonvulsants         | mirtazapine         | Antidepressants                     |
| mephenytoin       | Anticonvulsants         | nefazodone          | Antidepressants                     |
| mephobarbital     | Anticonvulsants         | nortriptyline       | Antidepressants                     |
| methsuximide      | Anticonvulsants         | paroxetine          | Antidepressants                     |
| oxcarbazepine     | Anticonvulsants         | phenelzine          | Antidepressants                     |
| phenacemide       | Anticonvulsants         | protriptyline       | Antidepressants                     |
| phenobarbital     | Anticonvulsants         | selegiline          | Antidepressants                     |
| phensuximide      | Anticonvulsants         | sertraline          | Antidepressants                     |
| phenytoin         | Anticonvulsants         | St. John's wort     | Antidepressants                     |
| pregabalin        | Anticonvulsants         | tranylcypromine     | Antidepressants                     |
| primidone         | Anticonvulsants         | trazodone           | Antidepressants                     |
| rufinamide        | Anticonvulsants         | trimipramine        | Antidepressants                     |
| thiopental        | Anticonvulsants         | vilazodone          | Antidepressants                     |
| tiagabine         | Anticonvulsants         | acetylcarbromal     | Anxiolytics Sedatives And Hypnotics |
| topiramate        | Anticonvulsants         | alprazolam          | Anxiolytics Sedatives And Hypnotics |
| trimethadione     | Anticonvulsants         | amobarbital         | Anxiolytics Sedatives And Hypnotics |
| vigabatrin        | Anticonvulsants         | buspirone           | Anxiolytics Sedatives And Hypnotics |
| zonisamide        | Anticonvulsants         | butobarbital        | Anxiolytics Sedatives And Hypnotics |
| lithium           | Antimanic Agents        | butalbital          | Anxiolytics Sedatives And Hypnotics |
| aripiprazole      | Atypical Antipsychotics | chloral hydrate     | Anxiolytics Sedatives And Hypnotics |
| asenapine         | Atypical Antipsychotics | chlordiazepoxide    | Anxiolytics Sedatives And Hypnotics |
| chlorpromazine    | Antipsychotics          | chlormezanone       | Anxiolytics Sedatives And Hypnotics |
| clozapine         | Atypical Antipsychotics | clonazepam          | Anxiolytics Sedatives And Hypnotics |
| fluphenazine      | Antipsychotics          | clorazepate         | Anxiolytics Sedatives And Hypnotics |

| <b>Active ingredient</b>               | <b>Psychotropic drug class</b>             | <b>Active ingredient</b> | <b>Psychotropic drug class</b>      |
|----------------------------------------|--------------------------------------------|--------------------------|-------------------------------------|
| haloperidol                            | Antipsychotics                             | dexmedetomidine          | Anxiolytics Sedatives And Hypnotics |
| iloperidone                            | Antipsychotics                             | diazepam                 | Anxiolytics Sedatives And Hypnotics |
| loxapine                               | Antipsychotics                             | dichloralphenazone       | Anxiolytics Sedatives And Hypnotics |
| lurasidone                             | Antipsychotics                             | diphenhydramine          | Anxiolytics Sedatives And Hypnotics |
| mesoridazine                           | Antipsychotics                             | doxepin                  | Anxiolytics Sedatives And Hypnotics |
| molindone                              | Antipsychotics                             | doxylamine               | Anxiolytics Sedatives And Hypnotics |
| olanzapine                             | Atypical Antipsychotics                    | estazolam                | Anxiolytics Sedatives And Hypnotics |
| paliperidone                           | Atypical Antipsychotics                    | eszopiclone              | Anxiolytics Sedatives And Hypnotics |
| perphenazine                           | Antipsychotics                             | ethchlorvynol            | Anxiolytics Sedatives And Hypnotics |
| pimozide                               | Antipsychotics                             | flurazepam               | Anxiolytics Sedatives And Hypnotics |
| prochlorperazine                       | Antipsychotics                             | fospropofol              | Anxiolytics Sedatives And Hypnotics |
| promazine                              | Antipsychotics                             | halazepam                | Anxiolytics Sedatives And Hypnotics |
| quetiapine                             | Atypical Antipsychotics                    | hydroxyzine              | Anxiolytics Sedatives And Hypnotics |
| risperidone                            | Atypical Antipsychotics                    | lorazepam                | Anxiolytics Sedatives And Hypnotics |
| thioridazine                           | Antipsychotics                             | melatonin                | Anxiolytics Sedatives And Hypnotics |
| thiothixene                            | Antipsychotics                             | mephobarbital            | Anxiolytics Sedatives And Hypnotics |
| trifluoperazine                        | Antipsychotics                             | meprobamate              | Anxiolytics Sedatives And Hypnotics |
| triflupromazine                        | Antipsychotics                             | midazolam                | Anxiolytics Sedatives And Hypnotics |
| ziprasidone                            | Atypical Antipsychotics                    | oxazepam                 | Anxiolytics Sedatives And Hypnotics |
| amphetamine/<br>dextroamphetamine      | Central Nervous System<br>(CNS) Stimulants | pentobarbital            | Anxiolytics Sedatives And Hypnotics |
| armodafinil                            | CNS Stimulants                             | phenobarbital            | Anxiolytics Sedatives And Hypnotics |
| atomoxetine                            | CNS Stimulants                             | promethazine             | Anxiolytics Sedatives And Hypnotics |
| benzphetamine                          | CNS Stimulants                             | propiomazine             | Anxiolytics Sedatives And Hypnotics |
| dexmethylphenidate                     | CNS Stimulants                             | pyrilamine               | Anxiolytics Sedatives And Hypnotics |
| methylphenidate/<br>dexmethylphenidate | CNS Stimulants                             | quazepam                 | Anxiolytics Sedatives And Hypnotics |
| diethylpropion                         | CNS Stimulants                             | ramelteon                | Anxiolytics Sedatives And Hypnotics |
| doxapram                               | CNS Stimulants                             | secobarbital             | Anxiolytics Sedatives And Hypnotics |
| lisdexamfetamine                       | CNS Stimulants                             | sodium oxybate           | Anxiolytics Sedatives And Hypnotics |
| methamphetamine                        | CNS Stimulants                             | temazepam                | Anxiolytics Sedatives And Hypnotics |
| modafinil                              | CNS Stimulants                             | thiopental               | Anxiolytics Sedatives And Hypnotics |
| pemoline                               | CNS Stimulants                             | triazolam                | Anxiolytics Sedatives And Hypnotics |
| phendimetrazine                        | CNS Stimulants                             | zaleplon                 | Anxiolytics Sedatives And Hypnotics |
| phentermine                            | CNS Stimulants                             | zolpidem                 | Anxiolytics Sedatives And Hypnotics |

**Table 2. Prevalence of psychotropic polypharmacy defined as use of  $\geq 2$  psychotropic medications in pediatric patients across 29 states, 1999-2010**

| Year      | Number of eligible children | Number of children with $\geq 2$ any-class psychotropic medications | Prevalence % |
|-----------|-----------------------------|---------------------------------------------------------------------|--------------|
| 1999-2000 | 637,174                     | 135,007                                                             | 21.2         |
| 2001-2002 | 683,280                     | 149,889                                                             | 21.9         |
| 2002-2003 | 769,872                     | 171,652                                                             | 22.3         |
| 2003-2004 | 823,047                     | 198,725                                                             | 24.1         |
| 2004-2005 | 966,613                     | 233,588                                                             | 24.2         |
| 2005-2006 | 809,466                     | 211,883                                                             | 26.2         |
| 2006-2007 | 639,182                     | 177,346                                                             | 27.7         |
| 2007-2008 | 552,980                     | 151,580                                                             | 27.4         |
| 2008-2009 | 557,371                     | 148,287                                                             | 26.6         |
| 2009-2010 | 485,874                     | 132,436                                                             | 27.3         |

\*Defined as children with at least one psychotropic medication and 2 years continuous eligibility in FFS/PCCM program following the index psychotropic medication claim.

**Table 3. Prevalence of psychotropic polypharmacy (various definitions) by age group, across 29 states, 1999-2010 (n=3,198,296)**

| Age   | $\geq 2$<br>Any-class | $\geq 2$<br>Multi-class | $\geq 2$ SSRIs | $\geq 2$ ADs | $\geq 2$ APs | $\geq 2$ AAP | $\geq 2$<br>stimulants | $\geq 2$ $\alpha$ -<br>agonists |
|-------|-----------------------|-------------------------|----------------|--------------|--------------|--------------|------------------------|---------------------------------|
| <=5   | 4.5                   | 3.4                     | 0.00           | 0.09         | 0.09         | 0.08         | 0.05                   | 0.07                            |
| 6-9   | 17.8                  | 16.3                    | 0.02           | 0.8          | 0.5          | 0.4          | 0.3                    | 0.1                             |
| 10-14 | 22.5                  | 20.7                    | 0.08           | 2.5          | 1.0          | 0.8          | 0.2                    | 0.1                             |
| 15-17 | 23.7                  | 20.9                    | 0.14           | 4.7          | 1.5          | 1.1          | 0.1                    | 0.02                            |

**Table 4. Prevalence of psychotropic polypharmacy (various definitions) in pediatric patients by state across 29 states, 1999-2010**

| State          | Sample size | ≥2 Any-class | ≥ 2 Multi-class | ≥ 2 SSRIs | ≥ 2 Ads | ≥ 2 APs | ≥ 2 AAP | ≥ 2 stimulants | ≥ 2 α-agonists |
|----------------|-------------|--------------|-----------------|-----------|---------|---------|---------|----------------|----------------|
| Alabama        | 5,483       | 18.7         | 16.3            | 0.05      | 1.5     | 1.3     | 1.0     | 0.1            | 0.04           |
| Arkansas       | 85,196      | 12.3         | 11.0            | 0.04      | 1.4     | 0.2     | 0.1     | 0.1            | 0.05           |
| California     | 204,514     | 16.0         | 13.7            | 0.05      | 1.4     | 0.9     | 0.6     | 0.1            | 0.08           |
| Florida        | 119,448     | 21.5         | 19.4            | 0.05      | 1.5     | 0.8     | 0.5     | 0.2            | 0.18           |
| Georgia        | 184,841     | 12.3         | 10.9            | 0.03      | 1.0     | 0.4     | 0.3     | 0.1            | 0.02           |
| Idaho          | 28,125      | 21.2         | 19.1            | 0.10      | 3.5     | 1.3     | 1.2     | 0.1            | 0.11           |
| Illinois       | 493,093     | 6.9          | 6.1             | 0.02      | 0.4     | 0.2     | 0.1     | 0.1            | 0.04           |
| Indiana        | 73,483      | 25.2         | 22.8            | 0.09      | 3.2     | 1.1     | 0.9     | 0.3            | 0.11           |
| Kansas         | 24,952      | 34.9         | 32.3            | 0.10      | 4.5     | 2.6     | 2.2     | 0.2            | 0.33           |
| Louisiana      | 365,516     | 7.4          | 6.6             | 0.01      | 0.5     | 0.1     | 0.1     | 0.1            | 0.07           |
| Massachusetts  | 9,231       | 36.4         | 30.5            | 0.08      | 2.9     | 1.5     | 1.2     | 0.1            | 0.42           |
| Minnesota      | 26,362      | 42.0         | 37.2            | 0.10      | 6.4     | 1.9     | 1.8     | 0.2            | 0.45           |
| Mississippi    | 127,342     | 8.3          | 7.3             | 0.02      | 0.6     | 0.3     | 0.2     | 0.1            | 0.03           |
| Missouri       | 106,442     | 14.4         | 13.3            | 0.06      | 1.9     | 0.5     | 0.4     | 0.1            | 0.11           |
| Nebraska       | 2,053       | 48.8         | 38.2            | 0.02      | 4.2     | 4.6     | 3.4     | 0.3            | 0.49           |
| New Jersey     | 13,494      | 34.4         | 29.9            | 0.10      | 1.7     | 1.7     | 1.0     | 0.1            | 0.16           |
| New Mexico     | 9,437       | 8.3          | 7.1             | 0.02      | 1.6     | 0.3     | 0.2     | 0.0            | 0.01           |
| New York       | 121,560     | 22.2         | 19.8            | 0.03      | 0.8     | 1.1     | 0.9     | 0.1            | 0.11           |
| North Carolina | 230,476     | 12.6         | 11.2            | 0.02      | 0.9     | 0.4     | 0.3     | 0.2            | 0.08           |
| Ohio           | 162,692     | 20.4         | 18.1            | 0.05      | 1.8     | 1.0     | 0.9     | 0.2            | 0.14           |
| South Carolina | 126,596     | 11.3         | 10.1            | 0.03      | 0.9     | 0.1     | 0.1     | 0.1            | 0.07           |
| Tennessee      | 73,430      | 17.5         | 15.6            | 0.07      | 1.6     | 0.8     | 0.7     | 0.2            | 0.11           |
| Texas          | 468,018     | 11.9         | 10.7            | 0.03      | 1.2     | 0.4     | 0.4     | 0.1            | 0.07           |
| Virginia       | 53,827      | 21.7         | 19.5            | 0.09      | 2.7     | 1.1     | 0.9     | 0.2            | 0.20           |
| Washington     | 6,666       | 26.8         | 23.8            | 0.03      | 1.7     | 0.4     | 0.2     | 0.8            | 0.14           |
| West Virginia  | 37,171      | 21.2         | 19.1            | 0.06      | 2.3     | 0.5     | 0.4     | 0.3            | 0.15           |
| Wisconsin      | 37,503      | 36.3         | 32.3            | 0.07      | 3.0     | 1.8     | 1.6     | 0.3            | 0.41           |

PS: psychotropic; SSRI: selective serotonin reuptake inhibitor; AD: antidepressant; AP: antipsychotic; AAP: atypical antipsychotic.
